# Supplementary material for: Child outcomes after induction of labour or expectant management in women with preterm prelabour rupture of membranes between 34 and 37 weeks of gestation: study protocol of the PPROMEXIL Follow-up trial. A long-term follow-up study of the randomised controlled trials PPROMEXIL and PPROMEXIL-2
Source: PubMed Central journal article supplement (PMC8208011; doi:10.1136/bmjopen-2020-046046), 2021-06-15
Supplement: bmjopen-2020-046046supp002.pdf [file bmjopen-2020-046046supp002.pdf]

**Additional file 2.** SPIRIT schematic diagram of schedule of enrolment, interventions, and assessments of the women participating in PPROMEXIL trials and children participating in PPROMEXIL follow-up

|                           | STUDY PERIOD<br>Original PPROMEXIL trials - women              |                            |                                                  | STUDY PERIOD<br>PPROMEXIL Follow-up - children |                            |                        |
|---------------------------|----------------------------------------------------------------|----------------------------|--------------------------------------------------|------------------------------------------------|----------------------------|------------------------|
|                           | Enrolment original trials                                      | Allocation original trials | Outcomes original trials                         | Enrolment follow-up study                      | Assessment follow-up study | Close-out              |
| <b>TIMEPOINT</b>          | <i>Women with PPROM between 34 and 36+6 weeks of gestation</i> | t = 0                      | <i>Pregnancy, childbirth and neonatal period</i> | <i>After 10 – 12 years</i>                     | <i>Age 10-12 years</i>     | <i>Age 10-12 years</i> |
| <b>ENROLMENT:</b>         |                                                                |                            |                                                  |                                                |                            |                        |
| Eligibility screen        | X                                                              |                            |                                                  | X                                              |                            |                        |
| Informed consent          | X                                                              |                            |                                                  | X                                              | X                          |                        |
| Allocation                |                                                                | X                          |                                                  |                                                |                            |                        |
| <b>INTERVENTIONS:</b>     |                                                                |                            |                                                  |                                                |                            |                        |
| Induction of Labor        |                                                                | X                          |                                                  |                                                |                            |                        |
| Expectant Management      |                                                                | X                          |                                                  |                                                |                            |                        |
| <b>ASSESSMENTS:</b>       |                                                                |                            |                                                  |                                                |                            |                        |
| <i>Baseline variables</i> | X                                                              | X                          |                                                  | X                                              |                            |                        |
| <i>Outcome variables</i>  |                                                                |                            | X                                                |                                                | X                          | X                      |
