# Supplementary material for: Child outcomes after induction of labour or expectant management in women with preterm prelabour rupture of membranes between 34 and 37 weeks of gestation: study protocol of the PPROMEXIL Follow-up trial. A long-term follow-up study of the randomised controlled trials PPROMEXIL and PPROMEXIL-2
Source: PubMed Central journal article supplement (PMC8208011; doi:10.1136/bmjopen-2020-046046), 2021-06-15
Supplement: bmjopen-2020-046046supp003.pdf [file bmjopen-2020-046046supp003.pdf]

**Additional file 3.** GRIPP2 short form

| Section and topic                   | Item                                                                                                                                      | Reported on page No |
|-------------------------------------|-------------------------------------------------------------------------------------------------------------------------------------------|---------------------|
| 1: Aim                              | Report the aim of PPI in the study                                                                                                        | 8, 20-21            |
| 2: Methods                          | Provide a clear description of the methods used for PPI in the study                                                                      | 8, 20-21            |
| 3: Study results                    | Outcomes—Report the results of PPI in the study, including both positive and negative outcomes                                            | 8                   |
| 4: Discussion and conclusions       | Outcomes—Comment on the extent to which PPI influenced the study overall. Describe positive and negative effects                          | NA                  |
| 5: Reflections/critical perspective | Comment critically on the study, reflecting on the things that went well and those that did not, so others can learn from this experience | NA                  |
